# Supplementary material
Source: PubMed Central journal article supplement (PMC4223497)
Supplement: supp_M113.033217_mcp.M113.033217-1.pdf [file supp_M113.033217_mcp.M113.033217-1.pdf]

Supplementary Table 1. Primers used in real-time quantitative PCR

|            |                         |
|------------|-------------------------|
| RAB 5C F   | GGCTGTGATACCGCTCCTGT    |
| RAB 5C R   | GCCTCGTCCTCCGCTTTGTC    |
| Rab 11B F  | CCAAGCACCTGACCTATGAGA   |
| Rab 11B R  | CTGTGACACGATGCGGTAGA    |
| RanBP2 F   | TCTAGAATCTTTACACCTCCTGT |
| RanBP2 R   | GCAGTTTCTGAGGTAGTAGAGAC |
| PKM2 F     | ATCACGCTGGATAACGCCTAC   |
| PKM2 R     | GCGGATGAATGACGCAAAC     |
| Vimentin F | GAACCTGAGGGAAACTAATC    |
| Vimentin R | GAAAGGCACTTGAAAGCT      |

Supplementary Table 2. Sequences of shRNAs and Primers for overexpression of Rab 5C

|          |           |                                                                 |
|----------|-----------|-----------------------------------------------------------------|
| Rab 5Ci  | Sense     | TGCAAGAGAGCCGTGGAATTTTCAAGAGAAATTCCACGGCTCTCT<br>TGCTTTTTTC     |
|          | Antisense | TCGAGAAAAAAGCAAGAGAGCCGTGGAATTTCTCTTGAAAATTCC<br>ACGGCTCTCTTGCA |
| Rab 11Bi | Sense     | TGCAACATCGTCATCATGCTTTCAAGAGAAGCATGATGACGATGT<br>TGCTTTTTTC     |
|          | Antisense | TCGAGAAAAAAGCAACATCGTCATCATGCTTCTCTTGAAAGCATG<br>ATGACGATGTTGCA |
| Rab 5C   | Sense     | CGCGGATCCGCGATGGGGACCCGGGACGACGAGTA                             |
|          | Antisense | CCGCTCGAGCGGTCACAGGTTCTGGCAGCACTGCA                             |

Supplementary Table 3. Analysis of Western Blots Displayed in Figure 5.

|                                         | <i>A2780/A2780-DR</i> |
|-----------------------------------------|-----------------------|
| Rab 5C                                  | 4.20                  |
| Rab 11B                                 | 3.87                  |
| PKM2                                    | 5.75                  |
| Vimentin                                | 7.69                  |
| $\beta$ -actin <input type="checkbox"/> | 1.16                  |

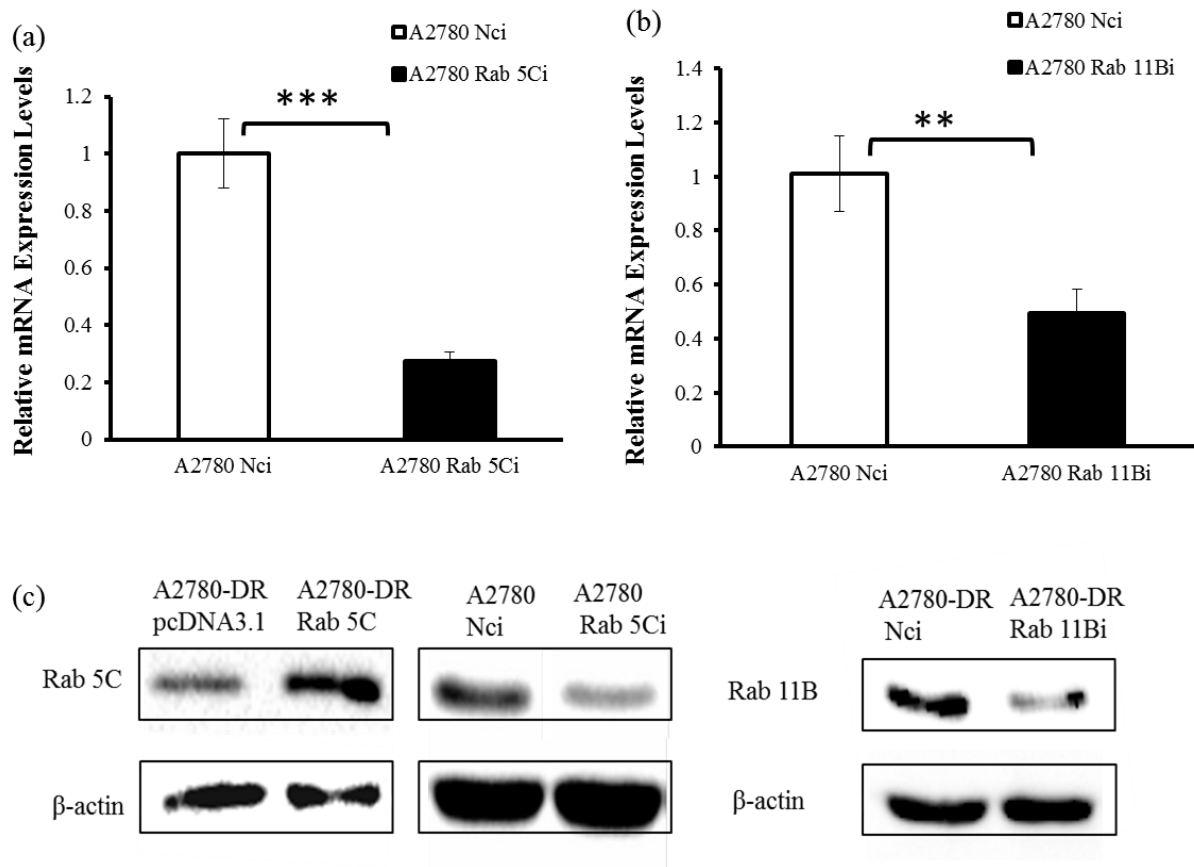

Supplementary Figure 1. (a) qPCR analysis of Rab 5C from A2780 and ShRNA-transfected cells; (b) qPCR analysis of Rab 11B from A2780 and ShRNA-transfected cells. (c) Western blot analysis of Rab 5C overexpression in A2780-DR cells; Rab 5C knockdown in A2780; and Rab 11B knockdown in A2780 cells. \*\* $p < 0.01$  and \*\*\* $p < 0.001$ .

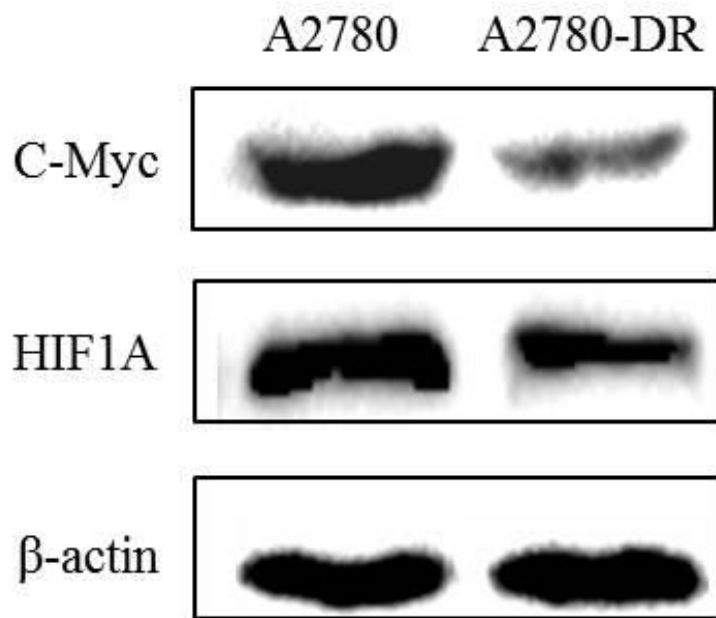

Supplementary Figure 2. Western blot analysis of c-Myc and HIF1A in A2780 and A2780-DR cells.

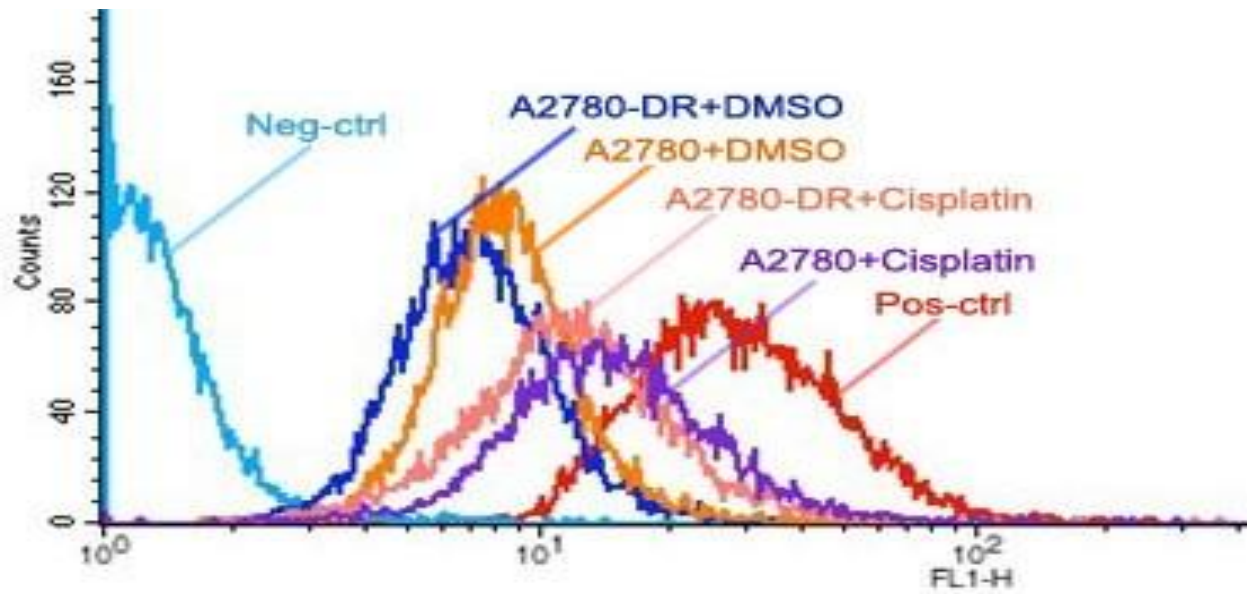

Supplementary Figure 3. Detection of ROS in untreated and cisplatin-treated A2780 and A2780-DR cells using the Image-iT LIVE Reactive Oxygen Species (ROS) Kit. Cells were labeled with carboxy-H<sub>2</sub>DCFDA and detected by flow cytometry.
